# Supplementary figures and images for: Synergistic enhancement of chemical composition, fermentation characteristics, and microbial community dynamics in triticale silage by inoculation with Streptococcus bovis and Lactobacillus plantarum
Source: Research Square preprint supplement (doi:10.21203/rs.3.rs-4712791/v1), 2024-08-09

| 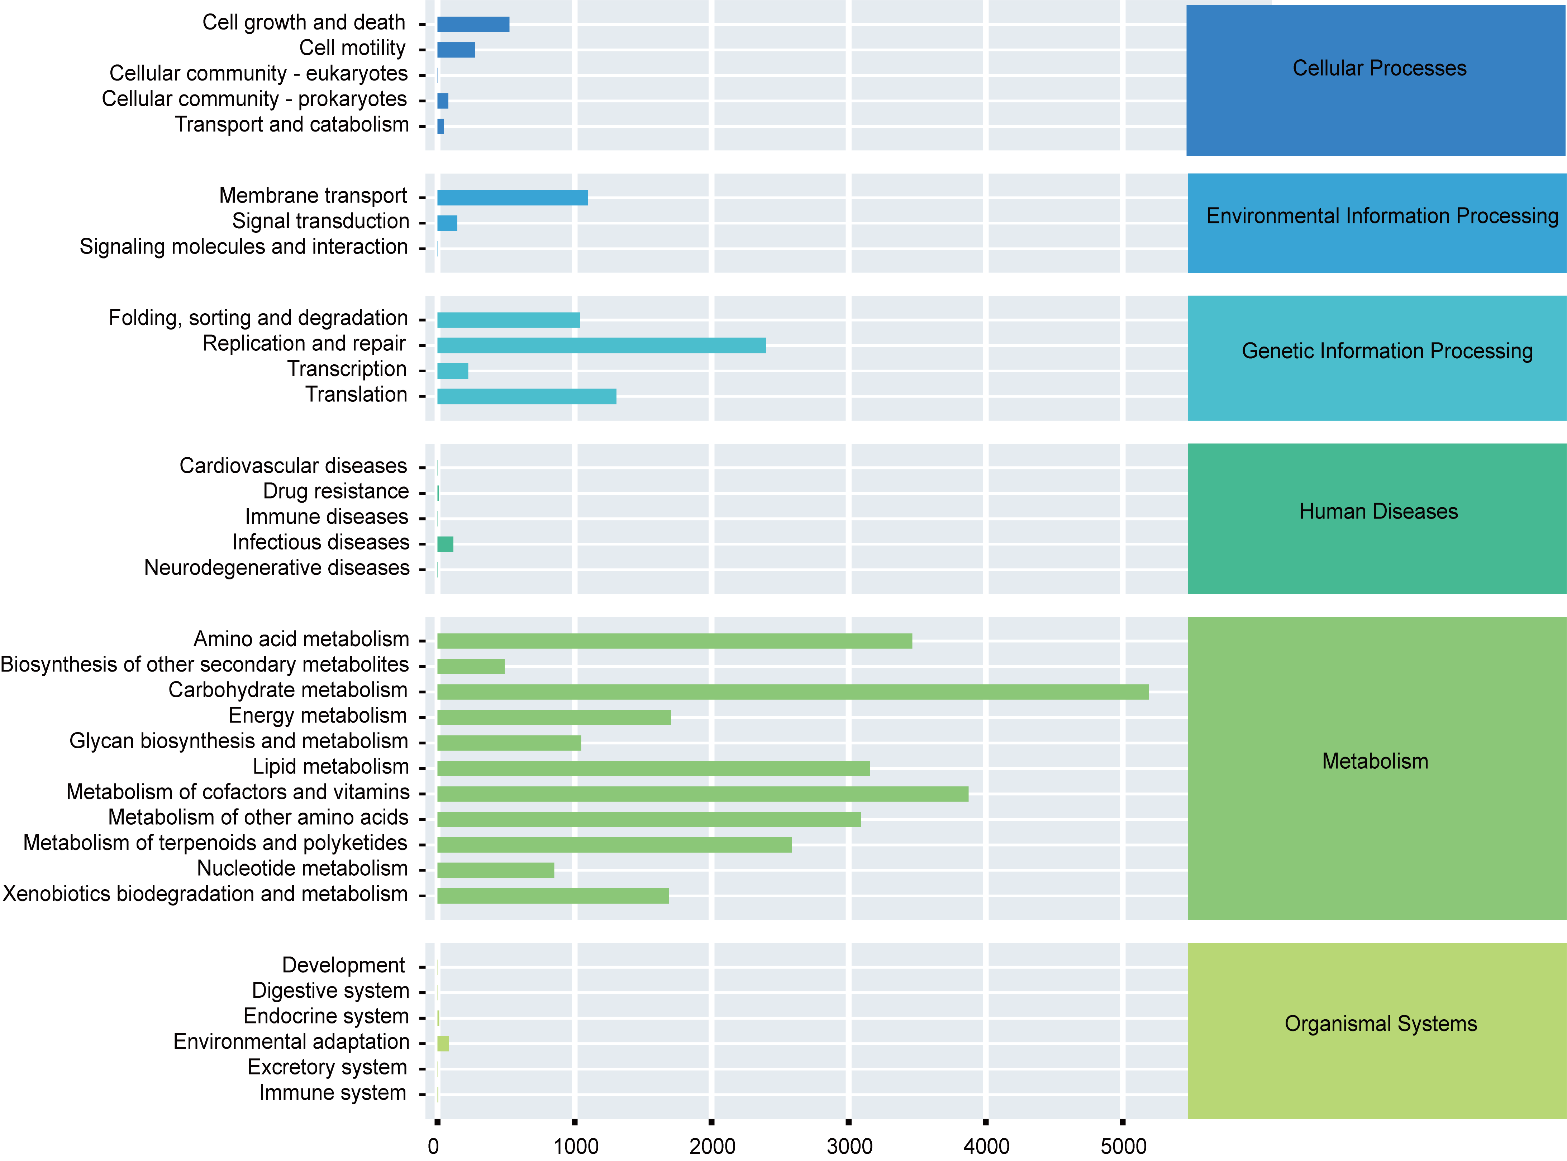 |
| --- |
| **Fig. S1** Abundance statistics of Level 1 metabolic pathways triticale silage by KEGG. |

Supplement: Supplementary file 1 [file a625dca55ecd64fc1a36d2ff.docx]
